1 **Dissecting the roles of GRK2 and GRK3 in  $\mu$ -opioid receptor internalization and  $\beta$ -arrestin2**  
2 **recruitment using CRISPR/Cas9-edited HEK293 cells**

3

4 **Authors:**

5 Mie F. Pedersen<sup>1,3</sup>, Thor C. Møller<sup>1,3\*</sup>, Sofie D. Seiersen<sup>1</sup>, Jesper M. Mathiesen<sup>1</sup>, Michel Bouvier<sup>2</sup>,  
6 Hans Bräuner-Osborne<sup>1\*</sup>.

7

8 <sup>1</sup>*Department of Drug Design and Pharmacology, University of Copenhagen, 2100 Copenhagen,*  
9 *Denmark.*

10 <sup>2</sup>*Department of Biochemistry and Molecular Medicine, Institute for Research in Immunology and*  
11 *Cancer, Université of Montréal, Montreal, QC, Canada*

12 <sup>3</sup>These authors contributed equally to this work

13 \*Co-corresponding authors: [thor.moller@sund.ku.dk](mailto:thor.moller@sund.ku.dk); [hbo@sund.ku.dk](mailto:hbo@sund.ku.dk)

14 **Abstract**

15 Most G protein-coupled receptors (GPCRs) recruit  $\beta$ -arrestins and are internalized upon agonist  
16 stimulation. For the  $\mu$ -opioid receptor ( $\mu$ -OR), this process has been linked to development of opioid  
17 tolerance. GPCR kinases (GRKs), particularly GRK2 and GRK3, have been shown to be important for  
18  $\mu$ -OR recruitment of  $\beta$ -arrestin and internalization. However, the contribution of GRK2 and GRK3 to  
19  $\beta$ -arrestin recruitment and receptor internalization, remain to be determined in their complete  
20 absence. By CRISPR/Cas9 we established HEK293 cells with knock-out of GRK2, GRK3 or both to  
21 dissect their individual contributions in  $\beta$ -arrestin2 recruitment and  $\mu$ -OR internalization upon  
22 stimulation with four different agonists. We showed that GRK2/3 removal reduced agonist-induced  
23  $\mu$ -OR internalization substantially. Furthermore, we found GRK2 to be more important for  $\mu$ -OR  
24 internalization than GRK3. In contrast, the effect of GRK2/3 knock-out on  $\beta$ -arrestin2 recruitment  
25 was minor. Rescue expression experiments restored GRK2/3 functions. The GRK2/3 small molecule  
26 inhibitor CMPD101 showed a high similarity between the genetic and pharmacological approaches,  
27 cross-validating the specificity of both. However, off-target effects were observed at high CMPD101  
28 concentrations. These GRK2/3 KO cell lines should prove useful for a wide range of studies on GPCR  
29 function.

30

31 **Introduction:**

32 The family of G protein-coupled receptors (GPCRs) constitute important drug targets, through  
33 which ~30% of all clinically approved medicines mediate their action<sup>1</sup>. Regulation of GPCR signaling  
34 following receptor activation is a complex process that typically involves recruitment of kinases that  
35 phosphorylate the receptor, which increases the affinity for  $\beta$ -arrestins and mediate receptor  
36 internalization<sup>2</sup>. The  $\mu$ -opioid receptor ( $\mu$ -OR) belongs to the family of rhodopsin-like (family A)

37 GPCRs and mediates the analgesic effects of opioid drugs and related side-effects and addictive  
38 properties<sup>3,4</sup>. The regulation of  $\mu$ -OR desensitization and trafficking has been suggested to be linked  
39 to the development of tolerance after chronic use of opioid drugs<sup>5</sup> and it is therefore important to  
40 understand the underlying molecular mechanisms.

41 Several studies indicate that receptor phosphorylation by GPCR kinases (GRKs) is important for  
42 the desensitization of  $\mu$ -OR signaling and initiation of internalization<sup>6-9</sup>. Out of the seven isotypes in  
43 the GRK family, four (GRK2, GRK3, GRK5 and GRK6) have been speculated to regulate  $\mu$ -OR *in vivo*  
44 due to their overlapping expression patterns<sup>10</sup>. Knock-out (KO) models have confirmed the  
45 importance of the individual GRKs. For instance, it has been demonstrated that fentanyl and  
46 morphine-induced tolerance are decreased in GRK3 KO mice<sup>11</sup>, morphine reward and dependence  
47 are lost in mice depleted of GRK5, but not GRK3, and morphine-induced locomotor activity is  
48 increased in mice lacking GRK6 compared to wild type littermates<sup>12,13</sup>. Altogether, these studies  
49 suggest that phosphorylation of  $\mu$ -OR by specific GRK subtypes differentially impacts the  
50 physiological outcome upon stimulation with opioids. The role of GRK2 has not been addressed in  
51 KO systems due to lethal effects of removing GRK2 in mouse embryos<sup>14</sup>. Instead, the role of GRK2  
52 has been studied using e.g. perfusion of a GRK2-inhibitory peptide or overexpression of a GRK2  
53 dominant negative mutant in rat neurons, both demonstrating a role of GRK2 in  $\mu$ -OR  
54 desensitization<sup>15,16</sup>.

55 Further insights into the mechanisms behind the role of GRKs in  $\mu$ -OR pharmacology has  
56 been obtained from *in vitro* studies. An early study demonstrated that phosphorylation of the  $\mu$ -OR  
57 could be increased by GRK2 overexpression, which led to increased  $\beta$ -arrestin recruitment and  $\mu$ -  
58 OR internalization<sup>17</sup>. The involvement of  $\mu$ -OR phosphorylation in these processes was confirmed  
59 by later studies<sup>18-21</sup>. In addition to GRK2, *in vitro* studies have shown that GRK3/5/6 have direct roles

60 in  $\mu$ -OR phosphorylation and/or internalization<sup>13,20,22–24</sup>. Moreover, studies have also utilized  
61 phospho-site specific antibodies to demonstrate that the  $\mu$ -OR is differentially phosphorylated by  
62 distinct GRK isotypes depending on the agonist used. For instance, stimulation with the agonist D-  
63 Ala(2)-mephe(4)-gly-ol(5)enkephalin (DAMGO) leads to phosphorylation of T370, S375, T376 and  
64 T379 in mouse  $\mu$ -OR whereas stimulation with morphine only leads to phosphorylation of S375<sup>20,23</sup>.  
65 In the same studies, the relative contribution of GRK2/3/5/6 to  $\mu$ -OR phosphorylation was also  
66 dependent of the agonist used.

67 The tools to study the involvement of GRKs in cell systems, has for now been restricted  
68 mainly to short-interfering RNA techniques<sup>20,23</sup>, the usage of dominant negative mutants of  
69 GRK2<sup>17,25</sup> and utilization of Takeda compound 101 (CMPD101), a reported GRK2/3 selective  
70 inhibitor<sup>26–28</sup>. To the best of our knowledge, no studies have investigated the role of GRKs in  $\mu$ -OR  
71 internalization in cell systems with complete KO of specific GRKs, which would prevent incomplete  
72 knockdown of expression, residual kinase activity or unwanted overexpression effects.

73 Here, we report construction of individual and double KO of GRK2 and GRK3 cell lines in the  
74 human embryonic kidney 293A (HEK293A) background, which we employ to investigate the agonist-  
75 induced  $\mu$ -OR internalization and  $\beta$ -arrestin2 recruitment in response to four different agonists. We  
76 find that KO of GRK2 and GRK3 reduces agonist-induced  $\mu$ -OR internalization without affecting  $\beta$ -  
77 arrestin2 recruitment to the membrane of HEK293A cells. Furthermore, we present a side-by-side  
78 comparison of the effects obtained with CMPD101 to the responses obtained in GRK2/3 double KO  
79 cells. We find highly similar results with the two approaches when 10  $\mu$ M of CMPD101 is used;  
80 higher CMPD101 concentrations lead to non-GRK2/3-mediated effects. The cell lines provide full KO  
81 of two important regulators of GPCR function and we expect them to be useful tools for future  
82 studies of GPCR function.

83

## 84 **Results**

### 85 **Validation of GRK2 and/or GRK3 genome-edited HEK293A cells**

86 Construction of individual and combined GRK2 and GRK3 KO HEK293A cells ( $\Delta$ GRK2,  $\Delta$ GRK3 and  
87  $\Delta$ GRK2/3) were performed using the clustered regularly interspaced short palindromic repeats  
88 (CRISPR)/CRISPR associated protein 9 (Cas9) technology. Clones containing complete modification  
89 of all alleles were identified with insertions or deletions in the *ADRBK1* locus (GRK2) and/or the  
90 *ADRBK2* locus (GRK3) leading to frameshifts as shown by sequencing and indel detection by  
91 amplicon analysis (IDAA). Furthermore, we confirmed the absence of full-length GRK2 protein  
92 expression in the  $\Delta$ GRK2 and  $\Delta$ GRK2/3 cells and of full-length GRK3 protein expression in the  $\Delta$ GRK3  
93 and  $\Delta$ GRK2/3 cells using GRK2- and GRK3-selective antibodies (**Fig. 1**). No alteration of GRK2  
94 expression in the  $\Delta$ GRK3 clone or GRK3 expression in the  $\Delta$ GRK2 clone compared to parental cells  
95 could be detected (**Fig. 1**).

96

### 97 **GRK2 and GRK3 contributes to $\mu$ -OR internalization**

98 We used a real-time internalization assay to determine the influence of GRK2 and GRK3 on  $\mu$ -OR  
99 internalization. This assay is based on time-resolved Förster resonance energy transfer (TR-FRET)  
100 between a long lifetime donor (Lumi4-Tb) covalently linked to an amino-terminal SNAP-tag on cell  
101 surface  $\mu$ -OR and a cell impermeant acceptor (fluorescein) in the extracellular buffer<sup>29,30</sup>.  
102 Internalization separates the donor and acceptor molecules thus preventing energy transfer and  
103 increasing the ratio of donor over acceptor emissions (internalization ratio). We compared the  
104 ability of four  $\mu$ -OR agonists to stimulate internalization: DAMGO, loperamide, fentanyl and  
105 morphine. All four agonists induced internalization in a concentration-dependent manner and

106 reached a plateau between 45 and 90 min after agonist addition in the parental HEK293A cells as  
107 well as in the  $\Delta$ GRK2,  $\Delta$ GRK3 and  $\Delta$ GRK2/3 cell lines (**Fig. 2, Supplementary Fig. S1**). Internalization  
108 was clearly reduced in the  $\Delta$ GRK cells with DAMGO, loperamide and fentanyl stimulation. A similar  
109 tendency was observed for morphine, but the effect was less clear compared to the three other  
110 agonists due to lower overall internalization levels with morphine stimulation. A cell line where  $\beta$ -  
111 arrestin1 and -2 have been deleted in the same cellular background as the  $\Delta$ GRK cell lines has  
112 previously been described<sup>31</sup>. None of the agonists were able to induce internalization in the  $\Delta\beta$ -  
113 arrestin1/2 cell line (**Fig. 2, Supplementary Fig. S1**). We used the area under the curve from the 90  
114 min real-time internalization ratio traces to plot concentration-response curves and determine the  
115 maximum response ( $E_{max}$ ) and potency ( $EC_{50}$ ) for the four agonists in each of the cell lines where  
116 internalization could be detected (**Fig. 2, Table 1**). For DAMGO, fentanyl and loperamide, we found  
117 a decrease in  $E_{max}$  compared to the parental cells of 48-62% and 22-23% in the  $\Delta$ GRK2 and the  
118  $\Delta$ GRK3 cell lines, respectively. The  $E_{max}$  was further reduced, but not completely abolished in the  
119  $\Delta$ GRK2/3 cell line and corresponded approximately to the sum of the reductions in the individual  
120  $\Delta$ GRK2 and  $\Delta$ GRK3 cell lines. The responses to morphine stimulation were too small for quantitative  
121 analysis. Importantly, there were no differences between the  $\mu$ -OR surface expression in the  
122 parental cells and the  $\Delta$ GRK2 and/or -3 cell lines (**Fig. 2e**). To determine whether the reduced  
123 internalization was due to off-target effects of the single guide RNAs (sgRNAs) we overexpressed  
124 the deleted GRKs in the corresponding cell lines. GRK2 or -3 overexpression restored the  
125 internalization ratio to the levels of the parental cells or higher, thus showing that the internalization  
126 machinery is fully functional in the  $\Delta$ GRK cell lines (**Supplementary Fig. S2**).

127

## 128 **GRK2 and GRK3 deletion does not reduce $\beta$ -arrestin2 recruitment**

129 To further investigate the mechanism linking GRK2/3 and  $\mu$ -OR internalization we measured the  
130 recruitment of  $\beta$ -arrestin2 to  $\mu$ -OR in the  $\Delta$ GRK2 and/or -3 cells using an enhanced bystander  
131 bioluminescence resonance energy transfer (ebBRET) assay<sup>32</sup>. In this assay, BRET between *Renilla*  
132 *reniformis* luciferase II (RlucII)-tagged  $\beta$ -arrestin2 and a membrane anchored *R. reniformis* GFP  
133 (rGFP) increases when  $\beta$ -arrestin2 is recruited to the membrane. Importantly, no modification of  
134 the intracellular domains of the receptor is required for this assay. We compared the ability of  
135 DAMGO, fentanyl, loperamide and morphine to induce  $\beta$ -arrestin2 recruitment to  $\mu$ -OR. In the  
136 parental HEK293A cells, fentanyl and loperamide stimulation led to similar maximum responses  
137 ( $E_{max}$ ), whereas DAMGO and morphine induced higher and lower  $E_{max}$ , respectively (**Fig. 3**). Based  
138 on the complete dependence of  $\mu$ -OR internalization on  $\beta$ -arrestin (**Fig. 2**), we expected a strong  
139 correlation between the  $\mu$ -OR internalization and  $\beta$ -arrestin2 recruitment. In contrast to this,  $\beta$ -  
140 arrestin2 recruitment was unchanged in the  $\Delta$ GRK2 and/or -3 cell lines, with the exception of the  
141  $\Delta$ GRK3 cell line where DAMGO stimulation led to a 40% increased recruitment (**Fig. 3, Table 2**). The  
142  $\mu$ -OR surface expression was the same in all cell lines (**Fig. 3e**) and the  $\Delta$ GRK cells were still sensitive  
143 to GRK2 or -3 overexpression (**Supplementary Fig. S3**). Indeed, rescue expression of either GRK2 or  
144 GRK3 led to a significant increase in  $\beta$ -arrestin2 recruitment in the three  $\Delta$ GRK cell lines for all the  
145 ligands. Notably, overexpression of GRK2 and GRK3, promoted morphine-induced  $\beta$ -arrestin2  
146 recruitment to levels similar to loperamide. These data indicate that although GRK2 and GRK3 can  
147 promote the recruitment of  $\beta$ -arrestin2 to  $\mu$ -OR, they are not essential for this recruitment in  
148 HEK293 cells. Taken with the results obtained for the internalization, these data also indicate that  
149 while it is necessary, the recruitment of  $\beta$ -arrestin2 is not sufficient to promote an efficient  
150 internalization.

151

## 152 **Bias towards $\beta$ -arrestin2 recruitment vs. internalization in $\Delta$ GRK2/3 cells**

153 To assess whether a bias between  $\mu$ -OR internalization and  $\beta$ -arrestin2 recruitment was  
154 detectable in the genome-edited cells compared to the parental cells, we calculated the differences  
155 between the transduction coefficients (**Fig. 4**). These calculations showed a significant bias towards  
156  $\beta$ -arrestin2 recruitment in the  $\Delta$ GRK2/3 cells compared to the parental cells, when stimulated with  
157 DAMGO or loperamide. When calculating the bias for morphine or fentanyl-stimulated cells, no  
158 significance was obtained between the cell lines due to higher variation. Yet, a tendency towards  $\beta$ -  
159 arrestin2 recruitment bias was observed for fentanyl-stimulated  $\mu$ -ORs in all the genome-edited  
160 cells compared to the parental cells. This analysis is consistent with the larger reductions in  
161 internalization than in  $\beta$ -arrestin2 recruitment that we observed upon deleting GRK2 and/or -3.

162

## 163 **Similar effects of genetic deletion and pharmacological inhibition of GRK2/3**

164 The small molecule inhibitor CMPD101 has been shown to selectively inhibit GRK2/3 over GRK1 and  
165 GRK5 *in vitro*<sup>27</sup>. We compared the internalization and  $\beta$ -arrestin recruitment results obtained in the  
166  $\Delta$ GRK2/3 cells with that obtained using the kinase inhibitor. At CMPD101 concentrations  $\leq 10 \mu\text{M}$ ,  
167 we observed no effect on receptor internalization in absence of agonist (basal internalization) (**Fig.**  
168 **5a**) or basal  $\beta$ -arrestin2 recruitment (**Fig. 5e**) in the parental HEK293A and  $\Delta$ GRK2/3 cells. With  
169 DAMGO stimulation in the parental cells, we found a concentration dependent decrease in  $\mu$ -OR  
170 internalization plateauing at a level similar to the  $\Delta$ GRK2/3 cells with an  $\text{IC}_{50}$  of  $1.8 \mu\text{M}$  ( $\text{pIC}_{50} = 5.79$   
171  $\pm 0.12$ ) (**Fig. 5b**) and in  $\beta$ -arrestin2 recruitment with an  $\text{IC}_{50}$  of  $0.73 \mu\text{M}$  ( $\text{pIC}_{50} = 6.13 \pm 0.14$ ) at  
172 CMPD101 concentrations  $\leq 10 \mu\text{M}$  (**Fig. 5f**). The reduction in DAMGO-induced  $\beta$ -arrestin2  
173 recruitment with CMPD101 was minor (25%) and similar to the recruitment in  $\Delta$ GRK2/3 cells ( $P =$



174 0.059, paired t-test). Thus, in this concentration range CMPD101 specifically inhibits GRK2/3 and  
175 reaches inhibition comparable to the  $\Delta$ GRK2/3 cell line at 10  $\mu$ M.

176 At CMPD101 concentrations  $\geq$  30  $\mu$ M decreases in basal and DAMGO-stimulated  $\mu$ -OR  
177 internalization were found both in parental and  $\Delta$ GRK2/3 cells (**Fig. 5a,b**). Basal  $\beta$ -arrestin2  
178 recruitment was increased at CMPD101 concentrations  $\geq$  30  $\mu$ M in parental and  $\Delta$ GRK2/3 cells,  
179 whereas no further effects were observed on DAMGO-induced recruitment at high CMPD101  
180 concentrations (**Fig. 5e,f**).  $\mu$ -OR surface expression was similar in the parental and  $\Delta$ GRK2/3 cells in  
181 the internalization experiments (**Fig. 5c**) and 25% higher in the  $\Delta$ GRK2/3 cells in the  $\beta$ -arrestin2  
182 recruitment experiments (**Fig. 5g**). Due to the long-lifetime donor fluorophore with several emission  
183 peaks and the homogenous format, the internalization assay is sensitive to compounds that absorb  
184 light in most of the visual spectrum. However, the donor signal in absence of acceptor was  
185 unaffected by CMPD101 even at concentrations  $\geq$  30  $\mu$ M (**Fig. 5d**), demonstrating that the observed  
186 effects at high concentrations were not due to optical interference with the internalization assay.  
187 We conclude that CMPD101 at concentrations above  $\geq$  30  $\mu$ M has a non-GRK2/3 regulatory effect  
188 on basal  $\mu$ -OR  $\beta$ -arrestin2 recruitment and internalization and DAMGO-stimulated  $\mu$ -OR  
189 internalization.

190

## 191 **Discussion**

192 Compelling evidence on the importance of GRKs in  $\mu$ -OR pharmacology has increased over the  
193 years. Yet, most of these studies has relied on methods either overexpressing dominant negative  
194 forms of the protein of interest or silencing with siRNAs, possibly leading to undesired effects of  
195 overexpression or incomplete removal of the target protein<sup>33</sup>. Genome editing is a promising  
196 alternative to these approaches for investigating their role as potential modulators of GPCR

197 function. In this study we have generated genome-edited HEK293 cells and used them to dissect the  
198 role of GRK2 and GRK3 in  $\mu$ -OR internalization and  $\beta$ -arrestin2 recruitment.

199 Previous studies have demonstrated that GRK2 and GRK3 affect the phosphorylation state of  
200 the <sup>375</sup>STANT<sup>379</sup> motif in mouse  $\mu$ -OR<sup>19,20,23</sup>, and this region has been directly linked to the regulation  
201 of  $\mu$ -OR internalization by mutational studies<sup>20,21</sup>. Here, we demonstrate that our  $\Delta$ GRK2,  $\Delta$ GRK3  
202 and  $\Delta$ GRK2/3 cell lines are excellent novel tools to dissect the role of these GRK subtypes in DAMGO,  
203 fentanyl and loperamide-induced  $\mu$ -OR internalization. Double KO of GRK2/3 had an additive effect  
204 on  $\mu$ -OR internalization with a significant reduction for DAMGO, fentanyl and loperamide-induced  
205  $\mu$ -OR internalization. No statistically significant difference could be reached for morphine-induced  
206  $\mu$ -OR internalization, however this agonist induces low  $\mu$ -OR internalization and thereby the effects  
207 could be masked by the small assay window. Our study also shows that there are additional factors  
208 controlling  $\mu$ -OR internalization, since deletion of GRK2/3 did not fully inhibit  $\mu$ -OR internalization.  
209 There is limited evidence suggesting that GRK5 or GRK6 could be responsible for this:  $\mu$ -OR  
210 internalization is sensitive to GRK5 and GRK6 overexpression<sup>13,22</sup> and GRK5 has been shown to be  
211 important in HEK293 cells and mouse brain for morphine-induced phosphorylation of Ser375<sup>23</sup>,  
212 which is a critical residue in initiating further C-terminal  $\mu$ -OR phosphorylation<sup>20</sup>. In contrast,  
213 DAMGO-induced phosphorylation of the C-terminal region of  $\mu$ -OR was shown to be unaffected by  
214 knockdown of GRK5 and GRK6<sup>20,23</sup> and fentanyl-induced Ser375 phosphorylation was unchanged in  
215 mice lacking GRK5<sup>12</sup>, so the roles of GRK5 and GRK6 might depend on the GRK expression levels in  
216 an individual cell. Several other kinases and enzymes have been proposed to regulate  $\mu$ -OR  
217 internalization, including phospholipase D2 (PLD2) and protein kinase C (PKC)<sup>5</sup>, but more studies are  
218 required to determine their role relative to the GRKs. Our successful generation of the  $\Delta$ GRK2,  
219  $\Delta$ GRK3 and  $\Delta$ GRK2/3 cell lines demonstrate the utility in this approach and calls for generation of

220 additional cell lines with KO of other kinases to dissect other contributors to  $\mu$ -OR internalization in  
221 the future.

222 Since agonist-induced  $\mu$ -OR internalization was shown to be fully dependent on the presence of  
223  $\beta$ -arrestins (**Fig. 2**), we speculated that  $\beta$ -arrestin2 recruitment likewise would be affected by  
224 GRK2/3 removal. Surprisingly,  $\beta$ -arrestin2 recruitment was not significantly reduced for any of the  
225 agonist stimulations in the  $\Delta$ GRK2 and/or -3 cells (**Fig. 3, Table 2**).  $\beta$ -arrestin2 recruitment was  
226 actually increased slightly but significantly in  $\Delta$ GRK3 cells when stimulated with DAMGO, which is  
227 likely due to competition of GRK3 with GRK2 or another kinase that is more efficient at inducing  $\beta$ -  
228 arrestin2 recruitment. Treating the parental cells with the small molecule GRK2/3 inhibitor,  
229 CMPD101, showed a similar tendency upon stimulation with DAMGO, namely 60% reduction in  
230 internalization and only 25% reduction for  $\beta$ -arrestin2 recruitment (**Fig. 5b,f**). Previous studies have  
231 shown, that alanine substitutions of serine and threonine residues in the <sup>375</sup>STANT<sup>379</sup> motif lead to  
232 a reduction in the agonist-mediated  $\beta$ -arrestin2 recruitment<sup>21,34</sup>, and that residues in this motif are  
233 specifically phosphorylated by GRK2 and GRK3<sup>20,23,34</sup>. Since this study was performed on the  
234 unmodified  $\mu$ -OR, it cannot be excluded that there could occur redundant phosphorylation by other  
235 kinases, as the  $\mu$ -OR has been described to be phosphorylated by many different kinases<sup>5</sup>, and  
236 thereby retain the  $\beta$ -arrestin2 recruitment. While most of the studies mentioned above used the  
237 mouse  $\mu$ -OR, the human  $\mu$ -OR was used in this study. However, the STANT motif is fully conserved  
238 in human  $\mu$ -OR and the G protein activation and  $\beta$ -arrestin recruitment properties are very similar  
239 for mouse and human  $\mu$ -OR<sup>24,35</sup>, so species differences are unlikely to explain the observed  
240 differences.

241 The predominant paradigm of arrestin binding to a GPCR is a two-step model where a pre-  
242 complex is formed by binding of arrestin to the phosphorylated GPCR C-tail, followed by major

243 conformational changes in arrestin leading to a high affinity interaction with the core of the receptor  
244 7TM bundle<sup>36-40</sup>. Different arrestin conformations can result from this encounter depending on the  
245 receptor, agonist and the available kinases<sup>41-44</sup> and the arrestin conformation correlates with the  
246 trafficking properties of the receptor<sup>44</sup>. Accordingly, we hypothesize, that full phosphorylation of  
247 the  $\mu$ -OR is necessary in order for  $\beta$ -arrestin to be recruited and undergo the full conformational  
248 change to mediate receptor internalization, as  $\mu$ -OR internalization is dramatically reduced in the  
249  $\Delta$ GRK2/3 cells, however  $\beta$ -arrestin2 might still be able to be recruited to a partially phosphorylated  
250  $\mu$ -OR but not undergo the full activation necessary to mediate internalization. It should be noted  
251 that although our study shows that GRK2 and GRK3 are not necessary for recruitment of  $\beta$ -arrestin2  
252 in HEK293 cells, our rescue experiments here and in a previous study<sup>24</sup> have shown that GRK2 and  
253 GRK3 can promote  $\beta$ -arrestin recruitment, so they could be important in other cells.

254 An alternative arrestin binding and activation model has also been described where arrestin only  
255 engages the core of the receptor 7TM bundle<sup>45-48</sup>. Since we measure plasma membrane recruitment  
256 and not activation of  $\beta$ -arrestin2 this alternative model provides two additional possible  
257 explanations for our observations: (i) Stabilization of an active arrestin conformation is less efficient  
258 for the core interaction compared to the core and tail interaction<sup>47</sup> and that could explain why we  
259 see similar recruitment of  $\beta$ -arrestin2 but reduced internalization. (ii) Core interactions were shown  
260 to result in transient receptor interactions where  $\beta$ -arrestin is retained at the plasma membrane for  
261 several receptors, including  $\mu$ -OR<sup>46,48,49</sup> which results in reduced internalization but smaller changes  
262 in plasma membrane localization of  $\beta$ -arrestin compared to core and tail interaction in agreement  
263 with our studies.

264 Although using CRISPR/Cas9 genome editing to generate cell lines lacking specific proteins has  
265 several advantages over conventional methods for interrogating protein function, it has also been

266 criticized for potentially selecting clones that have compensated for the lack of the deleted  
267 protein<sup>50</sup>. We addressed this concern by transient expression of the deleted proteins and by  
268 pharmacological inhibition with CMPD101. Transient expression of GRK2 or GRK3 showed that  $\mu$ -  
269 OR in the genome-edited cells was still sensitive to regulation by GRK2 and GRK3. Comparison with  
270 pharmacological inhibition is an alternative way to characterize genome-edited cells if a specific and  
271 potent inhibitor exists. We compared the  $\mu$ -OR internalization and  $\beta$ -arrestin2 recruitment in the  
272  $\Delta$ GRK2/3 cells with the effect of the inhibitor CMPD101 on the parental cells and found highly similar  
273 results. Collectively, these results demonstrate that there are no significant compensatory  
274 mechanisms in the  $\Delta$ GRK2/3 cells of relevance to the  $\mu$ -OR functions studied here and confirms the  
275 utility of CMPD101 as a GRK2/3 selective pharmacological tool in concentrations up to 10  $\mu$ M. Our  
276  $\Delta$ GRK2/3 cells also proved to be a powerful tool to study specificity of GRK inhibitors as we could  
277 demonstrate off-target effects of CMPD101 at concentrations  $\geq$  30  $\mu$ M, which is a concentration  
278 range commonly used to inhibit GRK2/3<sup>28,34</sup>, thus cautioning the use of such high concentrations in  
279 future studies.

280 In conclusion, we have generated novel  $\Delta$ GRK2,  $\Delta$ GRK3 and  $\Delta$ GRK2/3 cell lines in the highly  
281 utilized HEK293A cell background. These cell lines complement the range of G protein and  $\beta$ -arrestin  
282 cell lines generated by Dr. Asuka Inoue<sup>51</sup> and thus expand this highly efficient tool box to study  
283 intracellular proteins involved in GPCR function and signaling. Here, we demonstrate the utility of  
284 the cell lines to study  $\mu$ -OR mediated  $\beta$ -arrestin2 recruitment to the cell membrane and  $\mu$ -OR  
285 internalization, but we envision that the cell lines could be used for a range of other studies and  
286 thus welcome all requests to obtain the  $\Delta$ GRK2,  $\Delta$ GRK3 and  $\Delta$ GRK2/3 cell lines for future studies.  
287

288 **Methods**

289 **Materials**

290 Dulbeccos's modified Eagle medium (DMEM, Cat# 61965-026), fetal bovine serum (FBS), Opti-MEM,  
291 Penicillin-Streptomycin, Dulbecco's phosphate buffered saline (DPBS, Cat# 14190-144), Hank's  
292 balanced salt solution (HBSS, Cat# 14175-053), restriction endonucleases, TOPO TA cloning kit for  
293 sequencing including TOP10 *E. coli.*, FastAP alkaline phosphatase, Pierce BCA Protein Assay Kit,  
294 dithiothreitol, PageRuler Plus Prestained Protein Ladder (10 to 250 kDa), Pierce 10x Tris-Glycine SDS  
295 Buffer, NuPAGE LDS Sample buffer (4x), SuperSignal West Pico PLUS and ELISA Femto  
296 chemiluminescent substrates, and Pluronic F-68 non-ionic surfactant were purchased from Thermo  
297 Fisher Scientific (Waltham, MA, USA). QuickExtract DNA Extraction Solution was purchased from  
298 Lucigen Corporation (WI, USA) and TEMPase Hot Start DNA Polymerase from Ampliqon (Odense,  
299 Denmark). Anti-GRK2 antibody (Cat# MAB43391, RRID:AB\_2818985) was from R&D Systems  
300 (Minneapolis, MN, USA), anti-GRK3 antibody (Cat# 80362, RRID:AB\_2799951) and anti-rabbit IgG  
301 antibody conjugated to horseradish peroxidase (HRP) (Cat# 7074, RRID:AB\_2099233) were from Cell  
302 Signaling Technology (Danvers, MA, USA), anti-GAPDH (Cat# NB600-502, RRID:AB\_10077682)  
303 antibody was from Novus Biologicals (Centennial, CO, USA) and anti-mouse IgG antibody conjugated  
304 to HRP (Cat# P0447, RRID:AB\_2617137) was from Agilent Technologies (Santa Clara, CA, USA). Mini-  
305 PROTEAN TDX Precast Protein Gels and Trans-Blot Turbo RTA Mini PVDF Transfer Kit were purchased  
306 from Bio-Rad Laboratories (Hercules, CA, USA). T4 PNK and T4 ligase were purchased from New  
307 England Biolabs (Ipswich, MA, USA). Plasmid-Safe ATP-Dependent DNase was purchased from  
308 Epicentre Technologies Corp. (Madison, WI, USA). Primers and sgRNA sequences were purchased  
309 from TAG Copenhagen (Copenhagen, Denmark). FuGene6 Transfection Reagent was purchased  
310 from Promega (Madison, WI, USA). Polyethylenimine (PEI) was purchased from Polysciences Inc.

311 (Warrington, PA, USA). Coelenterazine 400a was purchased from Cayman Chemical Company (Ann  
312 Arbor, MI, USA). Tag-lite SNAP Lumi4-Tb was purchased from Cisbio (Codolet, France). DAMGO was  
313 purchased from Abcam (Cambridge, United Kingdom). Anti-FLAG M2 antibody (Cat# F3165,  
314 RRID:AB\_259529), morphine sulfate, fentanyl citrate, and loperamide hydrochloride, RIPA buffer,  
315 Cell Dissociation Solution, protease inhibitor cocktail, Trizma base, skim milk powder, and Tween 20  
316 were purchased from Sigma-Aldrich (St. Louis, MO, USA). CMPD101 was purchased from Tocris  
317 Bioscience (Bristol, UK).

318

### 319 **Plasmids**

320 The following plasmids were described previously: pcDNA5/FRT/TO-FLAG- $\mu$ -OR<sup>22</sup>, pcDNA3.1(+)- $\beta$ -  
321 arrestin1 and pcDNA3.1(+)- $\beta$ -arrestin2<sup>52</sup>, pcDNA3.1/Zeo- $\beta$ -arrestin2-RlucII<sup>53</sup> and pcDNA3.1(+)-  
322 rGFP-CAAX<sup>32</sup>. pSpCas9(BB)-2A-GFP (PX458) was a gift from Feng Zhang (Addgene plasmid # 48138;  
323 <http://n2t.net/addgene:48138>; RRID:Addgene\_48138) and was described previously<sup>54</sup>. The  
324 pcDNA3.1(+)-GRK2 and pcDNA3.1(+)-GRK3 constructs were kind gifts from Novo Nordisk A/S  
325 (Maaloev, Denmark).

326

### 327 **Cell lines and culturing**

328 The parental HEK293A and  $\Delta\beta$ -arrestin1/2 cell lines were kind gifts from Dr. Asuka Inoue<sup>31</sup>. All cell  
329 lines were cultured in DMEM supplemented with 10% FBS and 100 U/ml Penicillin-Streptomycin at  
330 37 °C and 5% CO<sub>2</sub> in a humidified incubator.

331

### 332 **Design and cloning of sgRNAs**

333 sgRNA sequences were identified using the WTSI Genome Editing (WGE) tool by screening exonic  
334 regions of the genes *ADRBK1* (RefSeq: NC\_000011.10) or *ADRBK2* (RefSeq: NC\_000022.11) encoding  
335 GRK2 and GRK3, respectively. sgRNAs with low predicted off target effects and binding sites  
336 upstream of regions encoding catalytic sites in the GRK proteins were chosen, resulting in the sgRNA  
337 sequence 5'-CTTCGACTCATACATCATGA-3' binding in exon 4 within the *ADRBK1* gene and the sgRNA  
338 sequence 5'-ATTATTGGACGAGGAGGATT-3' binding in exon 8 within the *ADRBK2* gene. Overhangs  
339 for cloning into a Bsal restriction site were placed in the ends of the sgRNAs. sgRNAs were prepared  
340 for cloning by incubating 100  $\mu$ M of reverse complementary strands with T4 PNK in a thermocycler  
341 at 37 °C for 30 minutes followed by a 5-minute incubation at 95 °C and ramping down to 25 °C with  
342 5 °C/min. The double stranded sgRNAs were ligated into Bsal digested pSpCas9(BB)-2A-GFP by  
343 incubating with T4 DNA ligase for 1 hour at 22 °C. To remove excess non-ligated DNA, the samples  
344 were treated with Plasmid-Safe ATP-Dependent DNase for 30 minutes at 37 °C.

345

### 346 **Generation and validation of CRISPR-Cas9 KO cell lines**

347 HEK293A cells were seeded at a density of  $2 \times 10^5$  cells/well in a 6-well plate and incubated at 37 °C  
348 and 5% CO<sub>2</sub> in a humidified incubator. Twenty-four hours later cells were transfected with 500  
349 ng/well pSpCas9(BB)-2A-GFP encoding the sgRNAs using FuGene6 as the transfection reagent and  
350 the cells were incubated at 37 °C and 5% CO<sub>2</sub> in a humidified incubator. Forty-eight hours later, the  
351 cells were harvested by trypsination and sorted based on their GFP expression with fluorescence  
352 assisted cell sorting (FACS) using a MoFlo Astrios Cell Sorter (Beckman Coulter, Brea, CA, USA). Cells  
353 were seeded in 96-well culture plates to isolate single clones and were incubated at 37 °C and 5%  
354 CO<sub>2</sub> in a humidified incubator until ~70% confluent.



355

## 356 IDAA

357 Single clones were harvested from 96-well plates by trypsination and DNA was extracted using  
358 QuickExtract followed by cell lysis (20 min at 65 °C, 10 min at 98 °C) as described previously<sup>55</sup>. A tri-  
359 primer PCR described previously<sup>56</sup> was performed using TEMPase Hot Start DNA Polymerase. To  
360 amplify the *ADRBK1* locus, the following primers and concentrations were used: 0.05 μM forward  
361 primer (5'-AGCTGACCGGCAGCAAATTGCCAGGCCCTGGTGGGAATTCTATG-3'), 0.5 μM reverse  
362 primer (5'-GGACATGCTCAGTGGCACTCTTC-3') and 0.5 μM FAM forward primer (5'-6-FAM-  
363 AGCTGACCGGCAGCAAATTG-3'). For amplification of the *ADRBK2* locus following primers and  
364 concentrations were used: 0.05 μM forward primer (5'-  
365 AGCTGACCGGCAGCAAATTGCCTGGGGCATCTCATCCTTCAGC-3'), 0.5 μM reverse primer (5'-  
366 CGCCCGCCTACAGCTTATTTTC-3') and 0.5 μM FAM forward primer (5'-6-FAM-  
367 AGCTGACCGGCAGCAAATTG-3'). A touchdown thermocycling program was used with denaturation  
368 at 95 °C for 15 min followed by 15 cycles with an annealing temperature of 72 °C ramping down to  
369 58 °C with 1 °C/cycle. Subsequent 24 cycles with 58 °C as annealing temperature was performed  
370 ending with elongation at 72 °C for 20 min. For both annealing cycles, denaturation and elongation  
371 was performed at 95 °C and 72 °C for 30 s, respectively. IDAA on the resulting PCR products was  
372 executed by COBO Technologies Aps (Copenhagen, Denmark).

373

## 374 Genome sequencing

375 DNA from the genome-edited cell lines was extracted as described above for IDAA. The *ADRBK1* or  
376 *ADRBK2* regions targeted by the sgRNA were PCR amplified with the forward primers 5'-  
377 CCAGGCCCTGGTGGGAATTCTATG-3' (*ADRBK1*) and 5'-CCTGGGGCATCTCATCCTTCAGC-3' (*ADRBK2*)

378 and the same reverse primers as used for IDAA. PCR products were cloned into the pCR4-TOPO TA  
379 vectors using the TOPO TA cloning kit and used to transform TOP10 bacteria. DNA from 5-10 single  
380 clones was sequenced for each genome-edited cell line to determine the modifications for all alleles.

381

## 382 **Western blot**

383 Genome-edited HEK293A cells were incubated in 15-cm culture dishes at 37 °C and 5% CO<sub>2</sub> in a  
384 humidified incubator until ~90% confluency and harvested with ice cold Cell Dissociation Solution.  
385 Cells were centrifuged in a tabletop centrifuge at 4 °C for 5 min at 500 x *g*. Whole cell lysates were  
386 prepared from pellets by resuspending in RIPA buffer containing protease inhibitor cocktail. Cells  
387 were pulse sonicated for 30 s and incubated with end-over-end rotation at 4 °C for 60 min. Lysates  
388 were centrifuged in a tabletop centrifuge at 4 °C for 10 min at 15,000 x *g*. The supernatant was  
389 transferred to a clean microcentrifuge tube and the protein concentrations were determined using  
390 Pierce BCA Protein Assay Kit according to the manufacturer's instructions. The absorbance of the  
391 samples was measured at 562 nm on an EnSpire Multimode Plate Reader (PerkinElmer), and the  
392 values were converted to protein concentrations by interpolation from a bovine serum albumin  
393 (BSA) standard curve. Western blot samples were prepared with 50 µg protein in NuPAGE LDS  
394 Sample Buffer supplemented with 100 µM dithiothreitol (DTT) and heated for 30 s at 50 °C.  
395 Subsequently they were incubated for 15 minutes at room temperature and electrophoresed for 40  
396 min at 200 V. Proteins were transferred onto a polyvinylidene difluoride (PVDF) membrane followed  
397 by one hour blocking with 5% skim milk in Tris buffered saline with Tween 20 (TBS-T; 10 mM Tris pH  
398 7.4, 150 mM NaCl, 0.1% Tween 20). The PVDF membrane was incubated over night with anti-GRK2  
399 (0.1 µg/ml in TBS-T with 5% skim milk), anti-GRK3 (1:2000 in TBS-T with 5% skim milk) or anti-GAPDH  
400 (1:5000 in TBS-T with 1% BSA) at 4 °C. The membranes were washed three times with TBS-T and

401 incubated with secondary antibodies for one hour at room temperature with gentle agitation  
402 followed by three washes with TBS-T. Blots were developed with HRP substrate and imaged with a  
403 FluorChem HD2 system (ProteinSimple, San Jose, CA, USA).

404

#### 405 **$\beta$ -arrestin2 recruitment**

406 Parental HEK293A cells or genome-edited cells were transfected with PEI for  $\beta$ -arrestin2  
407 recruitment experiments as previously described<sup>32</sup> with 20 ng/ml  $\beta$ -arrestin2-RlucII (BRET donor),  
408 500 ng/ml rGFP-CAAX (BRET acceptor), pcDNA5/FRT/TO-FLAG- $\mu$ -OR and pcDNA3.1(+) for 500,000  
409 cells/ml. The amount of pcDNA5/FRT/TO-FLAG- $\mu$ -OR was adjusted for each cell line to equalize the  
410 expression: 15 ng/ml for parental HEK293A and  $\Delta$ GRK2, 20 ng/ml for  $\Delta$ GRK2/3 and 30 ng/ml for  
411  $\Delta$ GRK3. The total DNA amount was adjusted to 1  $\mu$ g/ml with pcDNA3.1(+). 32,000 cells mixed with  
412 DNA and PEI were added to each well in poly-D-lysine-coated white, opaque CulturPlate-96 96-well  
413 plates (PerkinElmer, Waltham, MA, USA). Forty-eight hours after transfection, cells were washed  
414 and incubated in assay buffer (HBSS supplemented with 1 mM CaCl<sub>2</sub>, 1 mM MgCl<sub>2</sub>, 20 mM HEPES  
415 and 0.01% Pluronic F-68, pH 7.4) for 30 min before addition of agonists. For experiments with  
416 CMPD101, cells were incubated for an additional 30 min in presence of CMPD101 before agonist  
417 addition. After 1 h agonist incubation at 37 °C, coelenterazine 400a was added to a final  
418 concentration of 2.5  $\mu$ M and 2 min later BRET was measured on an EnVision 2104 Multilabel Reader  
419 (PerkinElmer) equipped with BRET<sup>2</sup> filters: 410/80 nm (donor) and 515/30 nm (acceptor). BRET<sup>2</sup>  
420 ratios were calculated as the ratio of acceptor and donor emission (515 nm/410 nm). For  
421 concentration-response curves the buffer response was subtracted.

422

423 **ELISA**

424 Receptor surface expression in  $\beta$ -arrestin2 recruitment experiments was determined using enzyme-  
425 linked immunosorbent assay (ELISA) as previously described<sup>57</sup> with anti-FLAG as primary antibody  
426 in a 1:1000 dilution.

427

428 **TR-FRET real-time internalization**

429 Parental HEK293A cells or genome-edited cells were transfected with PEI for real-time  
430 internalization experiments with different amounts of pcDNA5/FRT/TO-FLAG- $\mu$ -OR depending on  
431 the cell line (same amounts for each cell line as in  $\beta$ -arrestin2 recruitment experiments) to equalize  
432 expression and the total DNA amount was adjusted to 1  $\mu$ g/ml with pcDNA3.1(+). 14,000 cells mixed  
433 with DNA and PEI were added to each well in a poly-D-lysine-coated white, opaque 384-well plates  
434 (Greiner Bio-One, Kremsmünster, Austria). Forty-eight hours after transfection, cells were labeled  
435 with 10  $\mu$ l Tag-lite Lumi4-Tb for 60 min at 37 °C in Opti-MEM. After labeling, cells were washed twice  
436 with assay buffer (HBSS supplemented with 1 mM CaCl<sub>2</sub>, 1 mM MgCl<sub>2</sub>, 20 mM HEPES and 0.01%  
437 Pluronic F-68, pH 7.4) and incubated for 5 min with 10  $\mu$ l of 100  $\mu$ M fluorescein-O'-acetic acid. The  
438 donor signal was measured before removing the second wash from the plate and used as a measure  
439 of the  $\mu$ -OR surface expression. For experiments with CMPD101, the compound was added together  
440 with fluorescein-O'-acetic acid and the incubation was extended to 30 min. 10  $\mu$ l agonist was then  
441 added and internalization was read immediately after for 90 min in 6 min intervals on an EnVision  
442 2104 Multilabel Reader using a 340/60 nm excitation filter and emission was recorded through  
443 520/8 nm (acceptor) and 615/8.5 nm (donor) emission filters. Internalization ratios were calculated  
444 as the ratio of donor over acceptor emission (615 nm/520 nm) for real-time internalization curves.  
445 For concentration-response curves the area under the real-time internalization curves was

446 calculated and the buffer response subtracted. The IC<sub>50</sub> of CMPD101 inhibition of internalization  
447 was determined by fitting the concentration-response curve obtained by subtracting the DAMGO –  
448 buffer response in  $\Delta$ GRK2/3 cells from the DAMGO – buffer response in parental cells.

449

#### 450 **Data analysis and statistics**

451 Data are presented as mean  $\pm$  SEM of  $n \geq 3$  independent experiments. Results were analyzed using  
452 Prism 7.0 (GraphPad Software, San Diego, CA, USA). Differences were determined with regular or  
453 repeated measures one-way ANOVA with Dunnett's multiple comparisons test or paired t-test on  
454 non-normalized data;  $P < 0.05$  was considered significant. In Fig. 1b where data was compared to a  
455 reference value without variance ( $100 \pm 0$ ), observations were compared to the reference value  
456 using a one sample t-test and the cutoff for what was considered a significant difference was  
457 adjusted to  $P < 0.05/n$  ( $n$  represents the number of compared observations) to account for multiple  
458 comparisons. Transduction coefficients used for quantification of ligand bias were determined by  
459 fitting to the operational model of agonism as previously published<sup>22</sup>.

460

#### 461 **Data Availability**

462 The datasets generated during the current study are available from the corresponding authors on  
463 reasonable request.

464

465

#### 466 **References:**

467 1. Hauser, A. S., Attwood, M. M., Rask-Andersen, M., Schiöth, H. B. & Gloriam, D. E. Trends in  
468 GPCR drug discovery: new agents, targets and indications. *Nat. Rev. Drug Discov.* **16**, 829–

- 469 842 (2017).
- 470 2. Hanyaloglu, A. C. & von Zastrow, M.. Regulation of GPCRs by endocytic membrane  
471 trafficking and its potential implications. *Annu. Rev. Pharmacol. Toxicol.* **48**, 537–568 (2008).
- 472 3. Dahan, A. *et al.* Anesthetic potency and influence of morphine and sevoflurane on  
473 respiration in mu-opioid receptor knockout mice. *Anesthesiology* **94**, 824–832 (2001).
- 474 4. Charbogne, P., Kieffer, B. L. & Befort, K. 15 years of genetic approaches in vivo for addiction  
475 research: Opioid receptor and peptide gene knockout in mouse models of drug abuse.  
476 *Neuropharmacology* **76**, 204–217 (2014).
- 477 5. Williams, J. T. *et al.* Regulation of  $\mu$ -opioid receptors: Desensitization, phosphorylation,  
478 internalization, and tolerance. *Pharmacol. Rev.* **65**, 223–254 (2013).
- 479 6. Wang, Z., Arden, J. & Sadee, W. Basal phosphorylation of  $\mu$  opioid receptor is agonist  
480 modulated and  $\text{Ca}^{2+}$ -dependent. *FEBS Lett.* **387**, 53–57 (1996).
- 481 7. Zhang, L. *et al.* Differential  $\mu$  opiate receptor phosphorylation and desensitization induced  
482 by agonists and phorbol esters. *J. Biol. Chem.* **271**, 11449–11454 (1996).
- 483 8. Yu, Y. *et al.*  $\mu$  opioid receptor phosphorylation, desensitization, and ligand efficacy. *J. Biol.*  
484 *Chem.* **272**, 28869–28874 (1997).
- 485 9. Deng, H. B. *et al.* Role for the C-terminus in agonist-induced  $\mu$  opioid receptor  
486 phosphorylation and desensitization. *Biochemistry* **39**, 5492–5499 (2000).
- 487 10. Raehal, K. M., Schmid, C. L., Groer, C. E. & Bohn, L. M. Functional selectivity at the  $\mu$ -opioid  
488 receptor: implications for understanding opioid analgesia and tolerance. *Pharmacol. Rev.*  
489 **63**, 1001–1019 (2011).
- 490 11. Terman, G. W. *et al.* G-protein receptor kinase 3 (GRK3) influences opioid analgesic  
491 tolerance but not opioid withdrawal. *Br. J. Pharmacol.* **141**, 55–64 (2004).

- 492 12. Glück, L. *et al.* Loss of morphine reward and dependence in mice lacking G protein-coupled  
493 receptor kinase 5. *Biol. Psychiatry* **76**, 767–774 (2014).
- 494 13. Raehal, K. M. *et al.* Morphine-induced physiological and behavioral responses in mice  
495 lacking G protein-coupled receptor kinase 6. *Drug Alcohol Depend.* **104**, 187–196 (2009).
- 496 14. Jaber, M. *et al.* Essential role of beta-adrenergic receptor kinase 1 in cardiac development  
497 and function. *Proc. Natl. Acad. Sci.* **93**, 12974–12949 (1996).
- 498 15. Li, A. H. & Wang, H.-L. G protein-coupled receptor kinase 2 mediates  $\mu$ -opioid receptor  
499 desensitization in GABAergic neurons of the nucleus raphe magnus. *J. Neurochem.* **77**, 435–  
500 444 (2001).
- 501 16. Bailey, C. *et al.* Involvement of PKC $\alpha$  and G-protein-coupled receptor kinase 2 in agonist-  
502 selective desensitization of  $\mu$ -opioid receptors in mature brain neurons. *Br. J. Pharmacol.*  
503 **158**, 157–164 (2009).
- 504 17. Zhang, J. *et al.* Role for G protein-coupled receptor kinase in agonist-specific regulation of  
505 mu-opioid receptor responsiveness. *Proc. Natl. Acad. Sci.* **95**, 7157–7162 (1998).
- 506 18. McPherson, J. *et al.*  $\mu$ -opioid receptors: correlation of agonist efficacy for signalling with  
507 ability to activate internalization. *Mol. Pharmacol.* **78**, 756–766 (2010).
- 508 19. Schulz, S. *et al.* Morphine induces terminal  $\mu$ -opioid receptor desensitization by sustained  
509 phosphorylation of serine-375. *EMBO J.* **23**, 3282–3289 (2004).
- 510 20. Just, S. *et al.* Differentiation of opioid drug effects by hierarchical multi-site  
511 phosphorylation. *Mol. Pharmacol.* **83**, 633–639 (2013).
- 512 21. Lau, E. K. *et al.* Quantitative encoding of the effect of a partial agonist on individual opioid  
513 receptors by multisite phosphorylation and threshold detection. *Sci. Signal.* **4**, ra52–ra52  
514 (2011).

- 515 22. Pedersen, M. F. *et al.* Biased agonism of clinically approved  $\mu$ -opioid receptor agonists and  
516 TRV130 is not controlled by binding and signaling kinetics. *Neuropharmacology*,  
517 doi:10.1016/J.NEUROPHARM.2019.107718
- 518 23. Doll, C. *et al.* Deciphering  $\mu$ -opioid receptor phosphorylation and dephosphorylation in  
519 HEK293 cells. *Br. J. Pharmacol.* **167**, 1259–1270 (2012).
- 520 24. Ehrlich, A. T. *et al.* Biased signaling of the mu opioid receptor revealed in native neurons.  
521 *iScience* **14**, 47–57 (2019).
- 522 25. Cerver, J., Xu, M., Jin, W., Lowe, J. & Chavkin, C. Distinct domains of the  $\mu$ -opioid receptor  
523 control uncoupling and internalization. *Mol. Pharmacol.* **65**, 528–537 (2004).
- 524 26. Ikeda, S., Manami, K. & Fujiwara, S., inventors; Takeda Pharmaceutical Company Ltd. Ikeda  
525 S., Keneko M., and Fujiwara S., assignees. Cardiotonic agent comprising GRK inhibitor.  
526 World patent WO2007034846. (2007).
- 527 27. Thal, D. M., Yeow, R. Y., Schoenau, C., Huber, J. & Tesmer, J. J. G. Molecular mechanism of  
528 selectivity among G protein-coupled receptor kinase 2 inhibitors. *Mol. Pharmacol.* **80**, 294–  
529 303 (2011).
- 530 28. Lowe, J. D. *et al.* Role of G protein-coupled receptor kinases 2 and 3 in  $\mu$ -opioid receptor  
531 desensitization and internalization. *Mol. Pharmacol.* **88**, 347–356 (2015).
- 532 29. Roed, S. N. *et al.* Real-time trafficking and signaling of the glucagon-like peptide-1 receptor.  
533 *Mol. Cell. Endocrinol.* **382**, 938–949 (2014).
- 534 30. Levoye, A. *et al.* A Broad G Protein-Coupled Receptor Internalization Assay that Combines  
535 SNAP-Tag Labeling, Diffusion-Enhanced Resonance Energy Transfer, and a Highly Emissive  
536 Terbium Cryptate. *Front. Endocrinol. (Lausanne)*. **6**, 167 (2015).
- 537 31. O’Hayre, M. *et al.* Genetic evidence that  $\beta$ -arrestins are dispensable for the initiation of  $\beta$ 2-



- 538           adrenergic receptor signaling to ERK. *Sci. Signal.* **10**, eaal3395 (2017).
- 539   32.   Namkung, Y. *et al.* Monitoring G protein-coupled receptor and  $\beta$ -arrestin trafficking in live  
540   cells using enhanced bystander BRET. *Nat. Commun.* **7**, 1–12 (2016).
- 541   33.   Boutros, M. & Ahringer, J. The art and design of genetic screens: RNA interference. *Nat.*  
542   *Rev. Genet.* **9**, 554–566 (2008).
- 543   34.   Miess, E. *et al.* Multisite phosphorylation is required for sustained interaction with GRKs  
544   and arrestins during rapid  $\mu$ -opioid receptor desensitization. *Sci. Signal.* **11**, eaas9609  
545   (2018).
- 546   35.   Benredjem, B. *et al.* Exploring use of unsupervised clustering to associate signaling profiles  
547   of GPCR ligands to clinical response. *Nat. Commun.* **10**, (2019).
- 548   36.   Schröder, K., Pulvermüller, A. & Hofmann, K. P. Arrestin and its splice variant Arr 1–370A (p  
549   44). Mechanism and biological role of their interaction with rhodopsin. *J. Biol. Chem.* **277**,  
550   43987–43996 (2002).
- 551   37.   Kumari, P. *et al.* Functional competence of a partially engaged GPCR– $\beta$ -arrestin complex.  
552   *Nat. Commun.* **7**, 13416 (2016).
- 553   38.   Sommer, M. E., Farrens, D. L., McDowell, J. H., Weber, L. A. & Smith, W. C. Dynamics of  
554   arrestin-rhodopsin interactions. *J. Biol. Chem.* **282**, 25560–25568 (2007).
- 555   39.   Kim, M. *et al.* Conformation of receptor-bound visual arrestin. *Proc. Natl. Acad. Sci.* **109**,  
556   18407–18412 (2012).
- 557   40.   Szczepek, M. *et al.* Crystal structure of a common GPCR-binding interface for G protein and  
558   arrestin. *Nat. Commun.* **5**, 4801 (2014).
- 559   41.   Shukla, A. K. *et al.* Distinct conformational changes in  $\beta$ -arrestin report biased agonism at  
560   seven-transmembrane receptors. *Proc. Natl. Acad. Sci.* **105**, 9988–9993 (2008).

- 561 42. Zimmerman, B. *et al.* Differential  $\beta$ -arrestin-dependent conformational signaling and  
562 cellular responses revealed by angiotensin analogs. *Sci. Signal.* **5**, (2012).
- 563 43. Nuber, S. *et al.*  $\beta$ -Arrestin biosensors reveal a rapid, receptor-dependent  
564 activation/deactivation cycle. *Nature* **531**, 661–664 (2016).
- 565 44. Lee, M. H. *et al.* The conformational signature of  $\beta$ -arrestin2 predicts its trafficking and  
566 signalling functions. *Nature* **531**, 665–668 (2016).
- 567 45. Jala, V. R., Shao, W.-H. & Haribabu, B. Phosphorylation-independent  $\beta$ -arrestin translocation  
568 and internalization of leukotriene B4 receptors. *J. Biol. Chem.* **280**, 4880–4887 (2005).
- 569 46. Jung, S.-R., Kushmerick, C., Seo, J. B., Koh, D.-S. & Hille, B. Muscarinic receptor regulates  
570 extracellular signal regulated kinase by two modes of arrestin binding. *Proc. Natl. Acad. Sci.*  
571 **114**, E5579–E5588 (2017).
- 572 47. Latorraca, N. R. *et al.* Molecular mechanism of GPCR-mediated arrestin activation. *Nature*  
573 **557**, 452–456 (2018).
- 574 48. Eichel, K. *et al.* Catalytic activation of  $\beta$ -arrestin by GPCRs. *Nature* **557**, 381–386 (2018).
- 575 49. Eichel, K., Jullié, D. & von Zastrow, M.  $\beta$ -Arrestin drives MAP kinase signalling from clathrin-  
576 coated structures after GPCR dissociation. *Nat. Cell Biol.* **18**, 303–310 (2016).
- 577 50. Luttrell, L. M. *et al.* Manifold roles of  $\beta$ -arrestins in GPCR signaling elucidated with siRNA  
578 and CRISPR/Cas9. *Sci. Signal.* **11**, eaat7650 (2018).
- 579 51. Milligan, G. & Inoue, A. Genome editing provides new insights into receptor-controlled  
580 signalling pathways. *Trends Pharmacol. Sci.* **39**, 481–493 (2018).
- 581 52. Gabe, M. B. N. *et al.* Human GIP(3-30)NH 2 inhibits G protein-dependent as well as G  
582 protein-independent signaling and is selective for the GIP receptor with high-affinity binding  
583 to primate but not rodent GIP receptors. *Biochem. Pharmacol.* **150**, 97–107 (2018).

- 584 53. Quoyer, J. *et al.* Pepducin targeting the C-X-C chemokine receptor type 4 acts as a biased  
585 agonist favoring activation of the inhibitory G protein. *Proc. Natl. Acad. Sci.* **110**, E5088–  
586 E5097 (2013).
- 587 54. Ran, F. A. *et al.* Genome engineering using the CRISPR-Cas9 system. *Nat. Protoc.* **8**, 2281–  
588 2308 (2013).
- 589 55. Lonowski, L. A. *et al.* Genome editing using FACS enrichment of nuclease-expressing cells  
590 and indel detection by amplicon analysis. *Nat. Protoc.* **12**, 581–603 (2017).
- 591 56. Yang, Z. *et al.* Fast and sensitive detection of indels induced by precise gene targeting.  
592 *Nucleic Acids Res.* **43**, e59–e59 (2015).
- 593 57. Nørskov-Lauritsen, L., Jørgensen, S. & Bräuner-Osborne, H. N-glycosylation and disulfide  
594 bonding affects GPRC6A receptor expression, function, and dimerization. *FEBS Lett.* **589**,  
595 588–597 (2015).

596

597 **Author contributions:**

598 M.F.P., T.C.M., J.M.M., M.B. and H.B.-O. participated in research design. M.F.P., T.C.M. and S.D.S.  
599 conducted experiments. M.F.P., T.C.M. and S.D.S. performed data analysis. M.F.P., T.C.M., S.D.S.  
600 and H.B.-O. wrote or contributed to drafting the manuscript. All authors edited and approved the  
601 final manuscript.

602

603 **Acknowledgements:**

604 We thank Dr. Asuka Inoue for the HEK293 parental and  $\Delta\beta$ -arrestin1/2 cell lines and for fruitful  
605 discussions and Jens Peter Stenvang for technical assistance with cell sorting. We also thank Eric  
606 Paul Bennett for input related to indel detection by amplicon analysis. H.B.-O. acknowledges

607 financial support from the Independent Research Fund Denmark | Medical Sciences (4183-00131A),  
608 the Lundbeck Foundation, the Novo Nordisk Foundation (NNF17OC0027004), the Carlsberg  
609 Foundation (CF17-0132) and the Toyota Foundation (9310-F). M.F.P. thank the Oticon Foundation  
610 (16-0668) and the Knud Højgaards Foundation (16-02-0142) for financial support. T.C.M.  
611 acknowledges funding from the European Union's Horizon2020 research and innovation  
612 programme under the Marie Skłodowska-Curie grant agreement No 797497. M.B. acknowledge the  
613 financial support from a Canadian Institute for Health Research (CIHR) Foundation grant (FDN-  
614 148431). M.B. also holds a Canada Research Chair in Signal Transduction and Molecular  
615 Pharmacology.

616

## 617 **Additional Information**

618 **Supplementary information** accompanies this paper at ...

619 **Competing Interests:** The authors declare no competing interests.

620

## 621 **Figure legends**

622 **Figure 1.** Validation of CRISPR/Cas9 knock-out cell lines. **(a)** Western blot analysis of full-length GRK2  
623 or GRK3 expression in parental or genome-edited cell lines with deletion of GRK2, GRK3 or GRK2/3.  
624 The anti-GRK2 and anti-GRK3 antibodies target a site C-terminal to the site that is genetically  
625 modified. GAPDH expression is detected to ensure equal loading. In cases where samples were not  
626 located directly next to each other on the blot, a vertical line on the blot indicates the splice junction.  
627 In all comparisons to the reference WT, samples from the genome-edited cells were located on the  
628 same blot and treated equally to the reference WT. **(b)** Quantification of anti-GRK2 and anti-GRK3  
629 western blots after normalization to the GAPDH signal. Mean  $\pm$  SEM of 3-7 independent

630 experiments. Expression in each of the KO cell lines was compared to the parental cells by one  
631 sample t-test using a reference value of 100 and the cutoff for what was considered a significant  
632 difference was adjusted to  $P < 0.05/n$  ( $n$  corresponds to the number of observations) to correct for  
633 multiple comparisons.  $***P < 0.001/n$ .

634

635 **Figure 2.** Agonist-induced internalization of  $\mu$ -OR in genetically modified cell lines. Internalization of  
636  $\mu$ -OR in response to a range of concentrations of (a) DAMGO, (b), fentanyl (c) loperamide, or (d)  
637 morphine in parental HEK293A (WT) cells or HEK293A cell lines with deletion of GRK2 ( $\Delta$ GRK2), GRK3  
638 ( $\Delta$ GRK3), GRK2 and -3 ( $\Delta$ GRK2/3) or  $\beta$ -arrestin1 and -2 ( $\Delta\beta$ -Arr1/2). Data represents the mean  $\pm$   
639 SEM of the area under the curve of 90 min real-time internalization experiments after buffer  
640 subtraction from 3-5 independent experiments carried out in duplicate. (e)  $\mu$ -OR cell surface  
641 expression determined by measuring donor signals in absence of acceptor. Data represents the  
642 mean of individual experiments (circles) as well as the mean  $\pm$  SEM (columns) from 6-9 independent  
643 experiments with 32 replicates per experiment. Expression in each of the knock-out cell lines was  
644 compared to the parental cells by one-way ANOVA with Dunnett's multiple comparisons test.  $**P =$   
645 0.001-0.01.

646

647 **Figure 3.**  $\beta$ -arrestin2 recruitment of  $\mu$ -OR in genetically modified cell lines. Recruitment of  $\beta$ -  
648 arrestin2-RlucII to the cell membrane monitored by ebBRET in response to a range of concentrations  
649 of (a) DAMGO, (b) fentanyl, (c) loperamide, or (d) morphine in parental HEK293A (WT) cells or  
650 HEK293A cell lines with deletion of GRK2 ( $\Delta$ GRK2), GRK3 ( $\Delta$ GRK3), or GRK2 and -3 ( $\Delta$ GRK2/3). Data  
651 represents the mean  $\pm$  SEM after buffer subtraction from 3-4 independent experiments carried out  
652 in duplicate. (e)  $\mu$ -OR surface expression measured by ELISA and normalized to expression in

653 parental cells. Data points represent the mean of individual experiments and bars represent the  
654 mean  $\pm$  SEM from six independent experiments performed in triplicate. Expression in each of the  
655 knock-out cell lines was compared to the parental cells by one-way repeated measures ANOVA with  
656 Dunnett's multiple comparisons test before normalization and no significant differences were found  
657 ( $P > 0.05$ ).

658

659 **Figure 4.** Bias profile of  $\mu$ -OR signaling in GRK2 and/or -3 knock out cells and WT cells. Concentration  
660 response curves from  $\mu$ -OR internalization and  $\beta$ -arrestin2 recruitment experiments were fitted to  
661 the operational model of agonism. The  $\Delta\log(\tau/K_A)$  was calculated with WT as the reference and the  
662  $\Delta\Delta\log(\tau/K_A)$  values by subtracting values obtained for internalization from those obtained in  $\beta$ -  
663 arrestin2 recruitment experiments. Bias values are presented from cells stimulated with DAMGO,  
664 loperamide, fentanyl and morphine. Data represent the mean  $\pm$  SEM of 3-4 individual experiments.  
665 Statistical significance compared to parental cells was assessed using one-way ANOVA analysis  
666 followed by Dunnett's multiple comparisons test.

667

668 **Figure 5.** GRK2/3 inhibition and off-target effects by CMPD101. Effect of a range of CMPD101  
669 concentrations on (a) basal (vehicle treated) or (b) 100  $\mu$ M DAMGO induced  $\mu$ -OR internalization  
670 and (e) basal (vehicle treated) or (f) 150  $\mu$ M DAMGO stimulated  $\beta$ -arrestin2 recruitment in parental  
671 HEK293A (WT) cells or HEK293A cell lines with deletion of GRK2 and -3 ( $\Delta$ GRK2/3). Data represents  
672 the mean  $\pm$  SEM after buffer (vehicle treated) or vehicle (DAMGO treated) subtraction from 3  
673 independent experiments carried out in duplicate.  $\mu$ -OR surface expression was determined from  
674 donor signals in absence of acceptor for internalization experiments (c) and by ELISA for  $\beta$ -arrestin2  
675 recruitment experiments (g). Data points represent the mean of individual experiments and bars

676 represent the mean  $\pm$  SEM from three independent experiments with 32 (internalization) or 3  
677 (ELISA) replicates per experiment. In **(g)** data was normalized to expression in parental cells. **(d)**  
678 Effect of a range of CMPD101 concentrations on donor signals in absence of acceptor. An unaffected  
679 donor signal indicates that the compound does not interfere with the assay. Data represents the  
680 mean  $\pm$  SEM from 3 independent experiments carried out in duplicate. Effect of different CMPD101  
681 concentrations on  $\Delta$ GRK2/3 cells in **(a)**, **(b)**, **(d)**, **(e)** and **(f)** was compared to buffer by one-way  
682 repeated measures ANOVA with Dunnett's multiple comparisons test before normalization.  
683 Expression in parental and  $\Delta$ GRK2/3 cells in **(c)** and **(g)** was compared by ratio paired t-test before  
684 normalization. \* $P$  = 0.01-0.05, \*\*\* $P$  < 0.001.  
685

**Table 1.**  $E_{max}$  (% of parental HEK293A (WT) cells) and  $pEC_{50}$  values for  $\mu$ -OR internalization obtained from fitting concentration-response curves to a four-parameter model of agonism. No fit could be obtained for experiments in cells where  $\beta$ -arrestin1 and -2 had been deleted.  $E_{max}$  and  $pEC_{50}$  values are the mean of 3-5 independent experiments.  $E_{max}$  and  $pEC_{50}$  in knock out cells are compared to the parental cells by one-way repeated measures ANOVA with Dunnett's multiple comparisons test before normalization.

|            | WT        |     |            |      | $\Delta$ GRK2   |     |                   |      | $\Delta$ GRK3   |     |                   |      | $\Delta$ GRK2/3 |     |                   |      |
|------------|-----------|-----|------------|------|-----------------|-----|-------------------|------|-----------------|-----|-------------------|------|-----------------|-----|-------------------|------|
|            | $E_{max}$ | SEM | $pEC_{50}$ | SEM  | $E_{max}$       | SEM | $pEC_{50}$        | SEM  | $E_{max}$       | SEM | $pEC_{50}$        | SEM  | $E_{max}$       | SEM | $pEC_{50}$        | SEM  |
| DAMGO      | 100       | 5   | 6.44       | 0.03 | 52 <sup>c</sup> | 5   | 6.27              | 0.06 | 77 <sup>a</sup> | 6   | 6.43              | 0.04 | 31 <sup>c</sup> | 9   | 6.14 <sup>b</sup> | 0.15 |
| Fentanyl   | 100       | 5   | 6.94       | 0.01 | 38 <sup>c</sup> | 5   | 6.75 <sup>c</sup> | 0.04 | 78 <sup>a</sup> | 5   | 6.81 <sup>c</sup> | 0.02 | 18 <sup>c</sup> | 6   | 7.03 <sup>a</sup> | 0.01 |
| Loperamide | 100       | 8   | 6.96       | 0.04 | 47 <sup>c</sup> | 7   | 6.74              | 0.10 | 78              | 8   | 6.95              | 0.07 | 18 <sup>c</sup> | 17  | 6.91              | 0.08 |
| Morphine   | 100       | 15  | 5.65       | 0.12 | 84              | 37  | 4.65              | 0.89 | 71              | 14  | 5.84              | 0.05 | 38              | 12  | 6.02              | 0.13 |

<sup>a</sup>  $P = 0.01-0.05$  compared to WT

<sup>b</sup>  $P = 0.001-0.01$  compared to WT

<sup>c</sup>  $P < 0.001$  compared to WT

**Table 2.**  $E_{max}$  (% of parental HEK293A (WT) cells) and  $pEC_{50}$  values for  $\mu$ -OR  $\beta$ -arrestin2 recruitment obtained from fitting concentration-response curves to a four-parameter model of agonism.  $E_{max}$  and  $pEC_{50}$  values are the mean of 3-4 independent experiments.  $E_{max}$  and  $pEC_{50}$  in knock out cells are compared to the parental cells by one-way repeated measures ANOVA with Dunnett's multiple comparisons test before normalization.

|            | WT        |     |            |      | $\Delta$ GRK2 |     |            |      | $\Delta$ GRK3    |     |            |      | $\Delta$ GRK2/3 |     |            |      |
|------------|-----------|-----|------------|------|---------------|-----|------------|------|------------------|-----|------------|------|-----------------|-----|------------|------|
|            | $E_{max}$ | SEM | $pEC_{50}$ | SEM  | $E_{max}$     | SEM | $pEC_{50}$ | SEM  | $E_{max}$        | SEM | $pEC_{50}$ | SEM  | $E_{max}$       | SEM | $pEC_{50}$ | SEM  |
| DAMGO      | 100       | 6   | 6.28       | 0.06 | 92            | 5   | 6.30       | 0.02 | 140 <sup>a</sup> | 6   | 6.29       | 0.02 | 84              | 13  | 6.30       | 0.06 |
| Fentanyl   | 100       | 8   | 6.72       | 0.13 | 97            | 20  | 6.52       | 0.19 | 108              | 9   | 6.84       | 0.09 | 78              | 9   | 6.83       | 0.08 |
| Loperamide | 100       | 6   | 7.11       | 0.02 | 84            | 8   | 7.07       | 0.09 | 117              | 5   | 7.11       | 0.04 | 94              | 11  | 6.99       | 0.11 |
| Morphine   | 100       | 23  | 5.70       | 0.29 | 89            | 25  | 5.68       | 0.65 | 123              | 27  | 5.93       | 0.49 | 88              | 29  | 5.94       | 0.24 |

<sup>a</sup>  $P = 0.001-0.01$  compared to WT



Figure 1

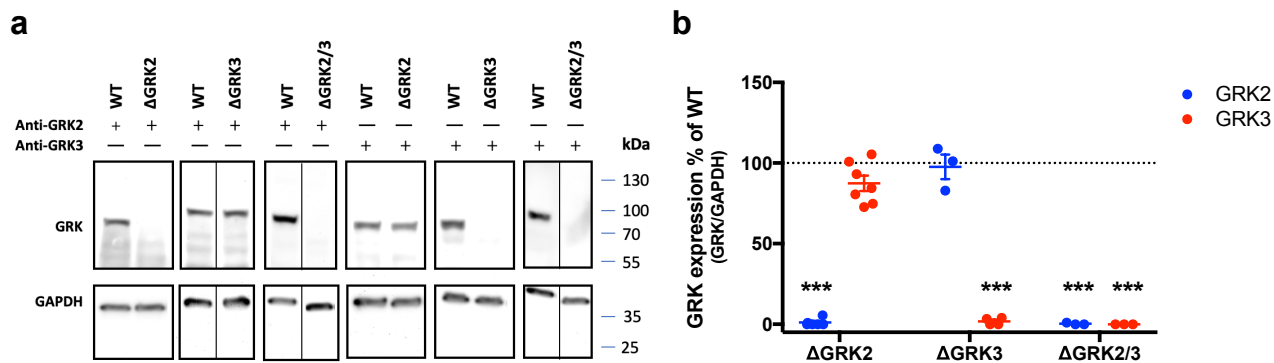

Figure 2

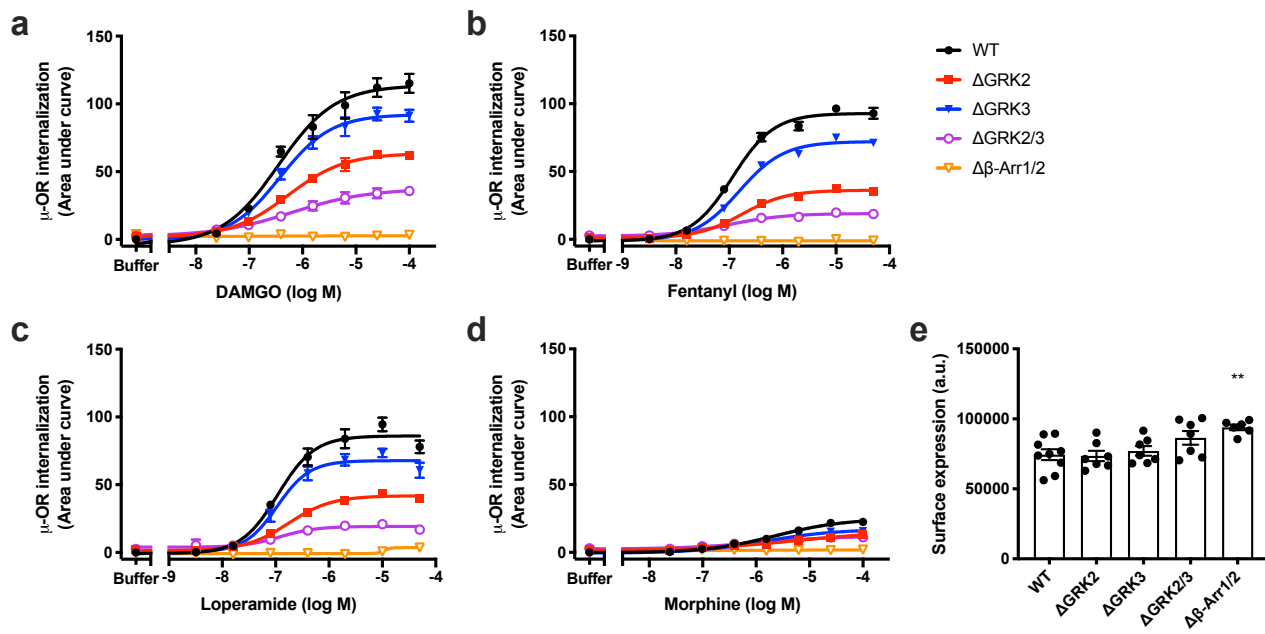

Figure 3

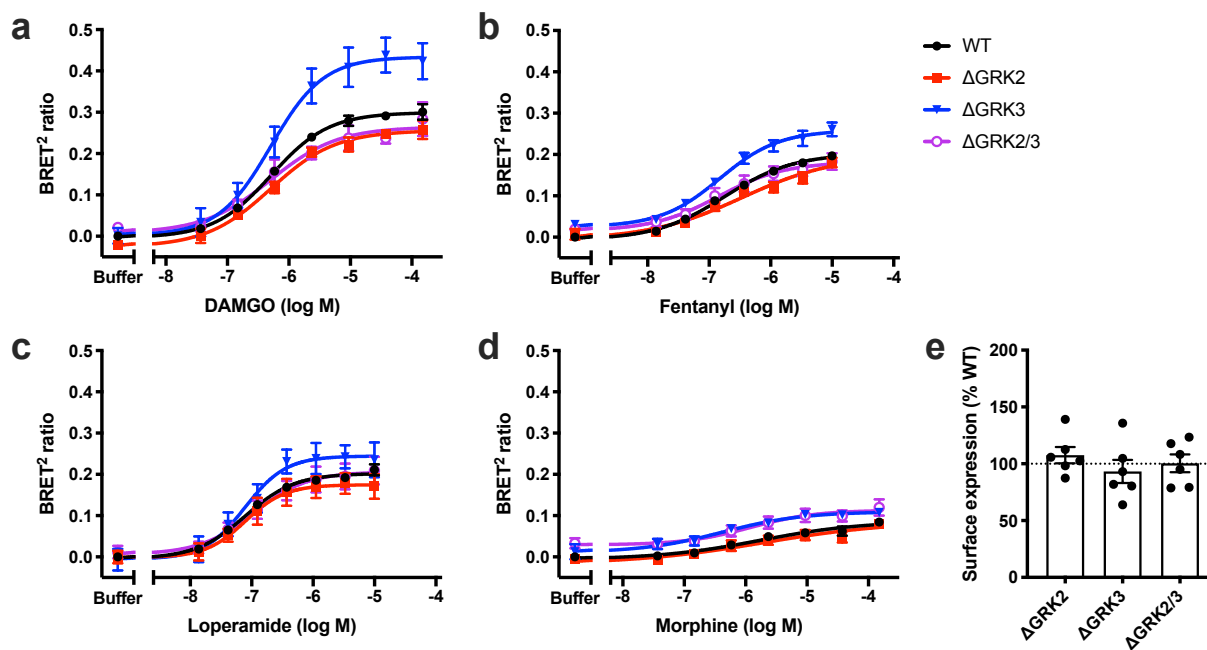

Figure 4

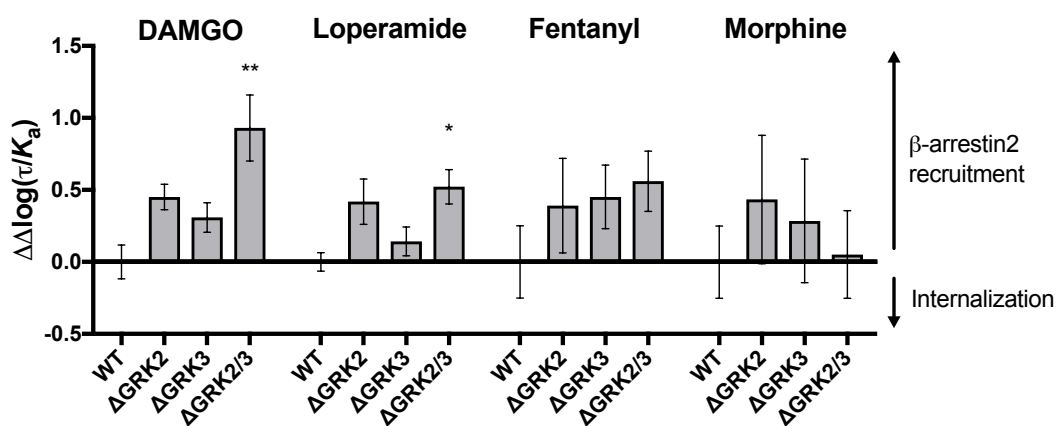

Figure 5

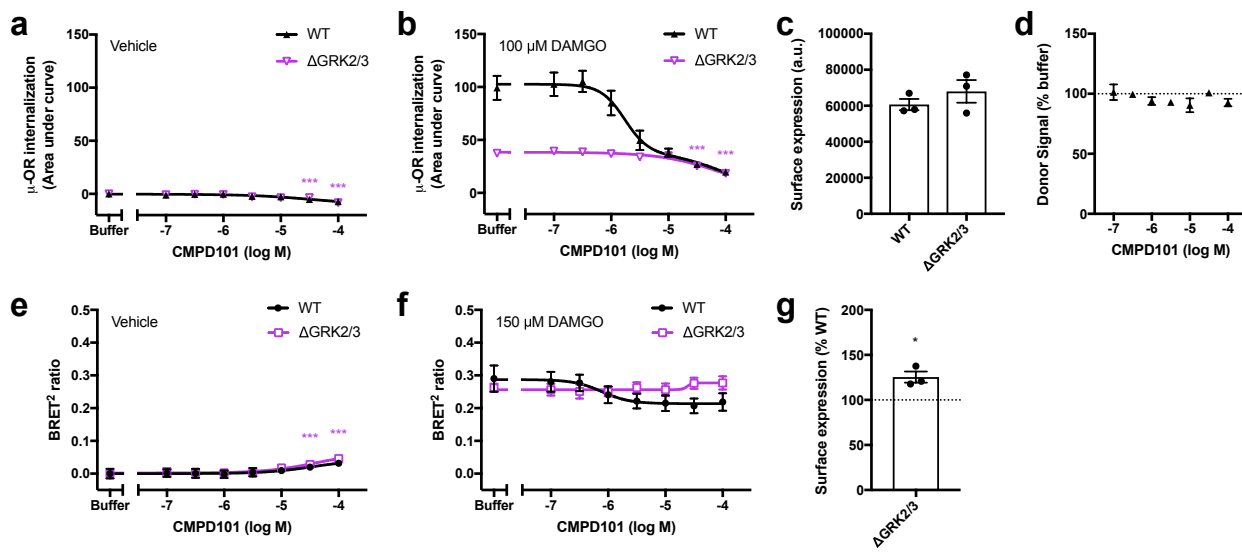

Source: http://biorxiv.org/content/10.1101/2020.01.08.898338v1.full.pdf
